# Supplementary material
Source: publisher figshare collection journal article supplement (https://tandf.figshare.com/ndownloader/files/23614361)
Supplement: Supplementary file 1 [file 23614361]

**Table S1** Meteorological factors at spring growth stage during the 2016-2017 and 2017-2018 seasons

| Growth season | Factor | April | May | June |
| --- | --- | --- | --- | --- |
| 2016-2017 | Average temperature (℃) | 13.30 | 23.51 | 26.15 |
| Precipitation (mm) | 7.77 | 26.43 | 54.38 |
| Total sunshine (hour) | 269.67 | 310.58 | 249.95 |
| Solar radiation (W/m2) | 686.67 | 782.64 | 726.62 |
| 2017-2018 | Average temperature (℃) | 13.39 | 21.98 | 27.74 |
| Precipitation (mm) | 23.58 | 71.79 | 51.19 |
| Total sunshine (hour) | 238.83 | 245.03 | 254.78 |
| Solar radiation (W/m2) | 713.52 | 766.61 | 702.74 |

**Table S2** Information of the NRT and N assimilation-associated family genes in *T. aestivum* and primers used for qRT-PCR analysis

| **Purpose** | **Accession number** | **Forward primer (5´-)** | **Reverse primer (5´-)** |
| --- | --- | --- | --- |
| *TaNRT1* expression | TraesCS1D02G035700 | GCAGTGGGGCGGCATGCTCG | TGTTCTCCGCGAAACGCTTG |
| *TaNRT2* expression | TraesCS3A02G254000 | ATCTACTTCCCGCAGTGGGG | GCACGCTGTTCTCCGCGAAA |
| *TaNRT3* expression | [TraesCS6B02G044300](http://plants.ensembl.org/Triticum_aestivum/Gene/Summary?g=TraesCS6B02G044300;r=6B:26625403-26626926;t=TraesCS6B02G044300.1;db=core) | CAC[A](http://plants.ensembl.org/Triticum_aestivum/ZMenu/TextSequence?db=core;factorytype=Location;g=TraesCS6B02G044300;r=6B:26625403-26626926;t=TraesCS6B02G044300.1;vf=36945)TCGTCGCAATACTCCAC | CTCTTCCGTGGCATCAGCGC |
| *TaNRT4* expression | TraesCS7A02G428500 | AATGGGCGTGGTGT[C](http://plants.ensembl.org/Triticum_aestivum/ZMenu/TextSequence?db=core;factorytype=Location;g=TraesCS7A02G428500;r=7A:621910950-621913739;t=TraesCS7A02G428500.1;vf=42483674)TG[G](http://plants.ensembl.org/Triticum_aestivum/ZMenu/TextSequence?db=core;factorytype=Location;g=TraesCS7A02G428500;r=7A:621910950-621913739;t=TraesCS7A02G428500.1;vf=42483675)TA | GTGGGAAATAGATGAGCACCA |
| *TaNRT5* expression | TraesCS7D02G420900 | GGATAGCTGGATAGGTACATG | AATGGGGAGGACACATCTGAG |
| *TaNRT6* expression | TraesCS7B02G328700 | AATCCGCCACCGTCGACCATG | AGTCTTGAGAGATTGTGTGGAG |
| *TaNRT7* expression | TraesCSU02G002800 | TTCATCTACTTCCCGCAGTGGG | GCACGCTGTTCTCGGCGAAA |
| *TaNR1* expression | [TraesCS4A02G376700](http://plants.ensembl.org/Triticum_aestivum/Gene/Summary?g=TraesCS4A02G376700;r=4A:651365942-651370213;t=TraesCS4A02G376700.1;db=core) | CCGGACAAGCTCAAGGTGTGGTA | CGAGATGGCGAACTTGATCAT |
| *TaNR2* expression | TraesCS4D02G047800 | GTGCATTTTTCTGTAACGTGTG | GCCATTCAACACACCAGTGAA |
| *TaNR3* expression | [TraesCS6A02G017500](http://plants.ensembl.org/Triticum_aestivum/Gene/Summary?g=TraesCS6A02G017500;r=6A:8694483-8700180;t=TraesCS6A02G017500.1;db=core) | GGTACGTGATCGACCAGGTGAA | GAGATGGCGAACTTGATCATGG |
| *TaNR4* expression | TraesCS6B02G356800 | AACA[G](http://plants.ensembl.org/Triticum_aestivum/ZMenu/TextSequence?db=core;factorytype=Location;g=TraesCS6B02G356800;r=6B:625241370-625244779;t=TraesCS6B02G356800.1;vf=41725026)GT[C](http://plants.ensembl.org/Triticum_aestivum/ZMenu/TextSequence?db=core;factorytype=Location;g=TraesCS6B02G356800;r=6B:625241370-625244779;t=TraesCS6B02G356800.1;vf=16311514)CTC[A](http://plants.ensembl.org/Triticum_aestivum/ZMenu/TextSequence?db=core;factorytype=Location;g=TraesCS6B02G356800;r=6B:625241370-625244779;t=TraesCS6B02G356800.1;vf=16311515)G[A](http://plants.ensembl.org/Triticum_aestivum/ZMenu/TextSequence?db=core;factorytype=Location;g=TraesCS6B02G356800;r=6B:625241370-625244779;t=TraesCS6B02G356800.1;vf=16311516)GA[T](http://plants.ensembl.org/Triticum_aestivum/ZMenu/TextSequence?db=core;factorytype=Location;g=TraesCS6B02G356800;r=6B:625241370-625244779;t=TraesCS6B02G356800.1;vf=16311517)CA[C](http://plants.ensembl.org/Triticum_aestivum/ZMenu/TextSequence?db=core;factorytype=Location;g=TraesCS6B02G356800;r=6B:625241370-625244779;t=TraesCS6B02G356800.1;vf=33779183)C | AGAAGACGAGGCAATCCTTGTC |
| *TaNR5* expression | TraesCS7A02G07850 | GTG[G](http://plants.ensembl.org/Triticum_aestivum/ZMenu/TextSequence?db=core;factorytype=Location;g=TraesCS7A02G078500;r=7A:43180494-43185382;t=TraesCS7A02G078500.1;vf=42223333;vf=33943469)TAGA[C](http://plants.ensembl.org/Triticum_aestivum/ZMenu/TextSequence?db=core;factorytype=Location;g=TraesCS7A02G078500;r=7A:43180494-43185382;t=TraesCS7A02G078500.1;vf=42223331;vf=42223332)CA[G](http://plants.ensembl.org/Triticum_aestivum/ZMenu/TextSequence?db=core;factorytype=Location;g=TraesCS7A02G078500;r=7A:43180494-43185382;t=TraesCS7A02G078500.1;vf=33943468)GTGAAACGG | GTGATGGCGAACTTGATCATGG |
| *TaNR6* expression | TraesCS7D02G073700 | [C](http://plants.ensembl.org/Triticum_aestivum/ZMenu/TextSequence?db=core;factorytype=Location;g=TraesCS7D02G073700;r=7D:43212472-43217253;t=TraesCS7D02G073700.1;vf=43056727;vf=43056728)GT[G](http://plants.ensembl.org/Triticum_aestivum/ZMenu/TextSequence?db=core;factorytype=Location;g=TraesCS7D02G073700;r=7D:43212472-43217253;t=TraesCS7D02G073700.1;vf=43056729)ATCGACCAGGTGAAGC | TCTTCTCGAGGTTGGGCGAGAT |
| *TaNIR1* expression | TraesCS1A02G323400 | CCTACTGGAATAGCA[C](http://plants.ensembl.org/Triticum_aestivum/ZMenu/TextSequence?db=core;factorytype=Location;g=TraesCS1A02G323400;r=1A:513735376-513739658;t=TraesCS1A02G323400.2;vf=271111)A[C](http://plants.ensembl.org/Triticum_aestivum/ZMenu/TextSequence?db=core;factorytype=Location;g=TraesCS1A02G323400;r=1A:513735376-513739658;t=TraesCS1A02G323400.2;vf=332834)G[C](http://plants.ensembl.org/Triticum_aestivum/ZMenu/TextSequence?db=core;factorytype=Location;g=TraesCS1A02G323400;r=1A:513735376-513739658;t=TraesCS1A02G323400.2;vf=30027784) | AATGGTGCTGGGACGTGTCCA |
| *TaNIR2* expression | TraesCS1D02G324200 | GGCA[G](http://plants.ensembl.org/Triticum_aestivum/ZMenu/TextSequence?db=core;factorytype=Location;g=TraesCS1D02G324200;r=1D:416471318-416475537;t=TraesCS1D02G324200.2;vf=35700490)AGGTTG[G](http://plants.ensembl.org/Triticum_aestivum/ZMenu/TextSequence?db=core;factorytype=Location;g=TraesCS1D02G324200;r=1D:416471318-416475537;t=TraesCS1D02G324200.2;vf=35700488;vf=35700489)CTT[T](http://plants.ensembl.org/Triticum_aestivum/ZMenu/TextSequence?db=core;factorytype=Location;g=TraesCS1D02G324200;r=1D:416471318-416475537;t=TraesCS1D02G324200.2;vf=759013)GTTGG | TTCCAGTAGGAAAACAGTGGTT |
| *TaNIR3* expression | TraesCS3D02G445900 | TACACCCGGAAGACAATGGC | CTGTCATAAAATGCTGCTCCCT |
| *TaNIR4* expression | TraesCS4B02G373400 | GCATATGCGAGCTCTC[G](http://plants.ensembl.org/Triticum_aestivum/ZMenu/TextSequence?db=core;factorytype=Location;g=TraesCS4B02G373400;r=4B:657977741-657983272;t=TraesCS4B02G373400.1;vf=39430495)GTG | GACACAACAGTCTTGGAACTGG |
| *TaNIR5* expression | TraesCS4D02G045800 | GTGG[C](http://plants.ensembl.org/Triticum_aestivum/ZMenu/TextSequence?db=core;factorytype=Location;g=TraesCS4D02G045800;r=4D:21516626-21522305;t=TraesCS4D02G045800.1;vf=39488001)TCGACGTATGTTCCCA | GCTCATCTCATCTGTGTAGG |
| *TaNIR6* expression | TraesCS6A02G333900 | CGGTCAAACTTTGTGAAGTTTGA | AGCAACAGTACACTGTAGCAC |
| *TaNIR7* expression | TraesCS6D02G313100 | GAGAGGGAGGAGGACGAGGA | GTGCGCCATGGAAGCATGG |
| *TaGS1* expression | TraesCS1A02G143000 | [G](http://plants.ensembl.org/Triticum_aestivum/ZMenu/TextSequence?db=core;factorytype=Location;g=TraesCS1A02G143000;r=1A:245518573-245527595;t=TraesCS1A02G143000.1;vf=29921739)[C](http://plants.ensembl.org/Triticum_aestivum/ZMenu/TextSequence?db=core;factorytype=Location;g=TraesCS1A02G143000;r=1A:245518573-245527595;t=TraesCS1A02G143000.1;vf=34777058)TAATC[G](http://plants.ensembl.org/Triticum_aestivum/ZMenu/TextSequence?db=core;factorytype=Location;g=TraesCS1A02G143000;r=1A:245518573-245527595;t=TraesCS1A02G143000.1;vf=29921740)GC[G](http://plants.ensembl.org/Triticum_aestivum/ZMenu/TextSequence?db=core;factorytype=Location;g=TraesCS1A02G143000;r=1A:245518573-245527595;t=TraesCS1A02G143000.1;vf=34777059)ATAAGCTTATT | GCAACATTATTTGTCGGCTTAAC |
| *TaGS2* expression | TraesCS1D02G141800 | CCTTCTGGAATCTGTAGAATCAC | TGAATGAGATCGCCAAATGCCC |
| *TaGS3* expression | TraesCS2B02G528300 | [G](http://plants.ensembl.org/Triticum_aestivum/ZMenu/TextSequence?db=core;factorytype=Location;g=TraesCS2B02G528300;r=2B:722629776-722634436;t=TraesCS2B02G528300.2;vf=36778504;vf=36778503)[G](http://plants.ensembl.org/Triticum_aestivum/ZMenu/TextSequence?db=core;factorytype=Location;g=TraesCS2B02G528300;r=2B:722629776-722634436;t=TraesCS2B02G528300.2;vf=31162061)CC[C](http://plants.ensembl.org/Triticum_aestivum/ZMenu/TextSequence?db=core;factorytype=Location;g=TraesCS2B02G528300;r=2B:722629776-722634436;t=TraesCS2B02G528300.2;vf=36778506;vf=36778505)T[C](http://plants.ensembl.org/Triticum_aestivum/ZMenu/TextSequence?db=core;factorytype=Location;g=TraesCS2B02G528300;r=2B:722629776-722634436;t=TraesCS2B02G528300.2;vf=513110)GC[T](http://plants.ensembl.org/Triticum_aestivum/ZMenu/TextSequence?db=core;factorytype=Location;g=TraesCS2B02G528300;r=2B:722629776-722634436;t=TraesCS2B02G528300.2;vf=527668;vf=36778507)GCCAA[G](http://plants.ensembl.org/Triticum_aestivum/ZMenu/TextSequence?db=core;factorytype=Location;g=TraesCS2B02G528300;r=2B:722629776-722634436;t=TraesCS2B02G528300.2;vf=36778508)AAGCT | GGATCAACAAGAATGGACGG |
| *TaGS4* expression | TraesCS2D02G500600 | GCTGGCGCTGAAGGTATGAA | TTCATACCTTCAGCGCCAGC |
| *TaGS5* expression | TraesCS3B02G090300 | GG[G](http://plants.ensembl.org/Triticum_aestivum/ZMenu/TextSequence?db=core;factorytype=Location;g=TraesCS3B02G090300;r=3B:59445265-59454030;t=TraesCS3B02G090300.1;vf=37836783)TG[G](http://plants.ensembl.org/Triticum_aestivum/ZMenu/TextSequence?db=core;factorytype=Location;g=TraesCS3B02G090300;r=3B:59445265-59454030;t=TraesCS3B02G090300.1;vf=31633878)AAGATC[G](http://plants.ensembl.org/Triticum_aestivum/ZMenu/TextSequence?db=core;factorytype=Location;g=TraesCS3B02G090300;r=3B:59445265-59454030;t=TraesCS3B02G090300.1;vf=37836784)TCGTGCA | ACCTAATCCATCCAACCGTCGG |
| *TaGS6* expression | TraesCS3D02G076500 | CGTCCACCACTCCAGGATCT | CTAGCTAGAACCTAGAAGGCC |
| *TaGS7* expression | TraesCS4A02G063800 | AAG[G](http://plants.ensembl.org/Triticum_aestivum/ZMenu/TextSequence?db=core;factorytype=Location;g=TraesCS4A02G063800;r=4A:60668121-60671232;t=TraesCS4A02G063800.1;vf=31998635)TCTAG[C](http://plants.ensembl.org/Triticum_aestivum/ZMenu/TextSequence?db=core;factorytype=Location;g=TraesCS4A02G063800;r=4A:60668121-60671232;t=TraesCS4A02G063800.1;vf=38713785)CTGTTTTTGG | ATCGAACGGAATCACATCACAA |
| *TaGS8* expression | TraesCS4B02G240900 | TGAGCCACCCAC[C](http://plants.ensembl.org/Triticum_aestivum/ZMenu/TextSequence?db=core;factorytype=Location;g=TraesCS4B02G240900;r=4B:499898695-499901767;t=TraesCS4B02G240900.1;vf=39323250)CACGG[C](http://plants.ensembl.org/Triticum_aestivum/ZMenu/TextSequence?db=core;factorytype=Location;g=TraesCS4B02G240900;r=4B:499898695-499901767;t=TraesCS4B02G240900.1;vf=39323251)C | TGAAAGACACCAAAGGCACGCC |
| *TaGS9* expression | TraesCS5A02G156200 | GTGTTCCCCAAGATGAA[G](http://plants.ensembl.org/Triticum_aestivum/ZMenu/TextSequence?db=core;factorytype=Location;g=TraesCS5A02G156200;r=5A:334748669-334752799;t=TraesCS5A02G156200.1;vf=39860526)CT | TCAAGCTTCCCAACCTTTCTT |
| *TaGS10* expression | TraesCS5D02G161500 | GGTGAATTTGTGGAGCTGATG | AATACAAACTCCTTGGAGCTCG |
| *TaGS11* expression | TraesCS6A02G298100 | CGT[C](http://plants.ensembl.org/Triticum_aestivum/ZMenu/TextSequence?db=core;factorytype=Location;g=TraesCS6A02G298100;r=6A:531394366-531398363;t=TraesCS6A02G298100.2;vf=41330989)[C](http://plants.ensembl.org/Triticum_aestivum/ZMenu/TextSequence?db=core;factorytype=Location;g=TraesCS6A02G298100;r=6A:531394366-531398363;t=TraesCS6A02G298100.2;vf=41330988)AACATGGACCCATAC | TCCAAATCCTCCAGTGGCCACC |
| *Tatubulin* expression | U76558 | CATGCTATCCCTCGTCTCGACCT | CGCACTTCATGATGGAGTTGTAT |
| *TaNRT1* overexpression cassette | TraesCS1D02G035700 | AAACCATGGAGCAG[C](http://plants.ensembl.org/Triticum_aestivum/ZMenu/TextSequence?db=core;factorytype=Location;g=TraesCS2B02G528300;r=2B:722629776-722634436;t=TraesCS2B02G528300.2;vf=36778329)TGCTCGA[C](http://plants.ensembl.org/Triticum_aestivum/ZMenu/TextSequence?db=core;factorytype=Location;g=TraesCS2B02G528300;r=2B:722629776-722634436;t=TraesCS2B02G528300.2;vf=36778330) | AAAGGTAACCCCGGAAGAATTCGGCC |
| *TaGS3* overexpression cassette | TraesCS2B02G528300 | AAACCATGGAGGGGGAGTCGAA[G](http://plants.ensembl.org/Triticum_aestivum/ZMenu/TextSequence?db=core;factorytype=Location;g=TraesCS3A02G254000;r=3A:475304797-475306341;t=TraesCS3A02G254000.1;vf=37552565;vf=37552564;vf=31403082)C | AAAGGTAACCTCACACGTCTGCCGGCGA |
